# Supplementary material for: Springtime precipitation effects on the abundance of fluorescent biological aerosol particles and HULIS in Beijing
Source: PubMed Central journal article supplement (PMC4965869; doi:10.1038/srep29618), 2016-07-29
Supplement: srep29618-s1.pdf [file srep29618-s1.pdf]

Supplementary Information

## Springtime precipitation effects on the abundance of fluorescent biological aerosol particles and HULIS in Beijing

Siyao Yue <sup>1,2</sup>, Hong Ren <sup>1,2</sup>, Songyun Fan <sup>1</sup>, Yele Sun <sup>1,3</sup>, Zifa Wang <sup>1,3</sup>, and Pingqing Fu <sup>1,3\*</sup>

<sup>1</sup> State Key Laboratory of Atmospheric Boundary Layer Physics and Atmospheric Chemistry, Institute of Atmospheric Physics, Chinese Academy of Sciences, Beijing 100029, China

<sup>2</sup> College of Earth Sciences, University of Chinese Academy of Sciences, Beijing 100049, China

<sup>3</sup> Center for Excellence in Urban Atmospheric Environment, Institute of Urban Environment, Chinese Academy of Sciences, Xiamen 361021, China

\*Corresponding author e-mail: [fupingqing@mail.iap.ac.cn](mailto:fupingqing@mail.iap.ac.cn)

This file contains seven pages with five figures (Figures S1-S5) and one table (Table S1).

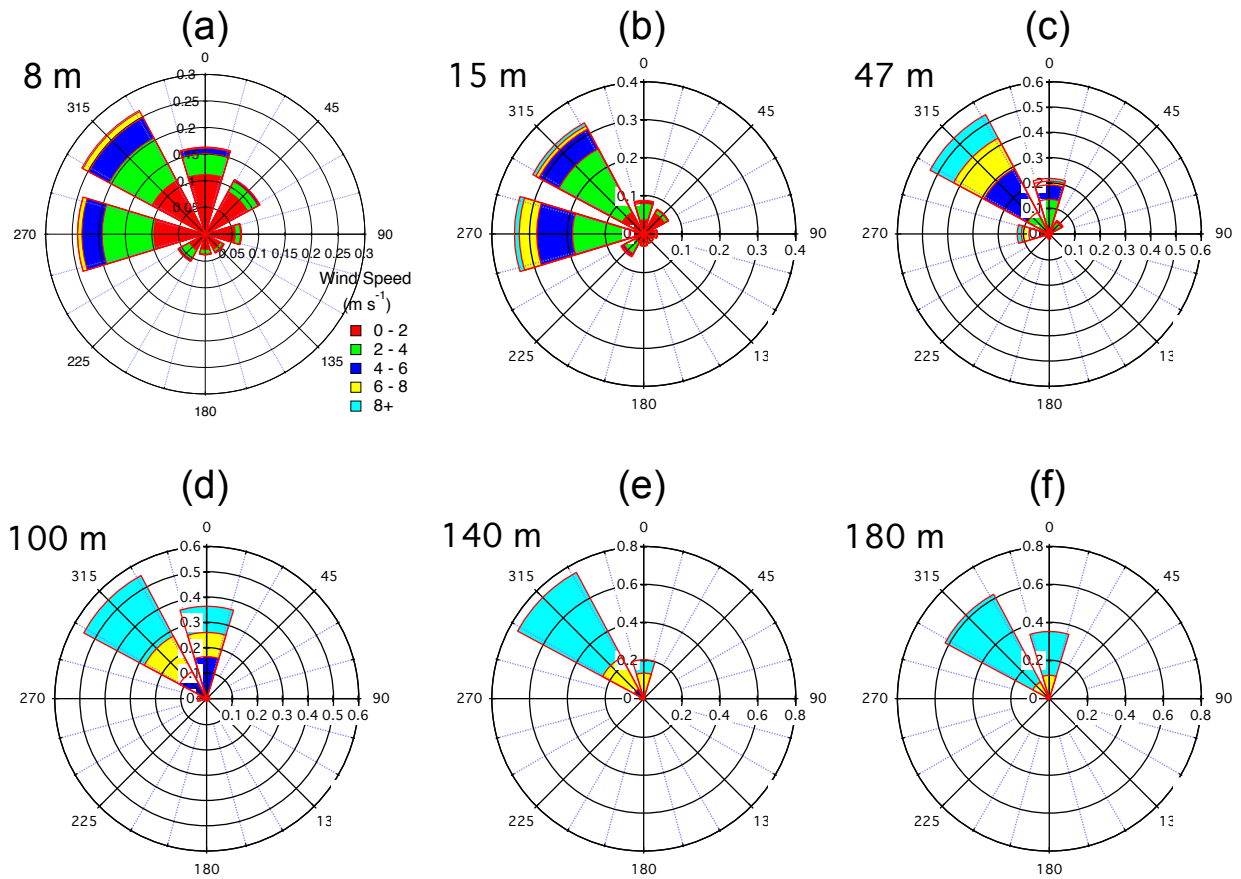

**Figure S1.** Rose plot of the wind in the time interval May 1, 16:40 - 19:40 for different layers measured on the tower. The rose plot's radius is the probability that a velocity value is within the given direction bin.

Figure S2 and Figure S3 show that no significant correlations between WIBS FL2, FL3 channels and off-line EEM HULIS fluorescence zones. Though the HULIS detected here are constrained to water-soluble proportions, it is, to some extent, reasonable to eliminate possible interference of HULIS on WIBS yields.

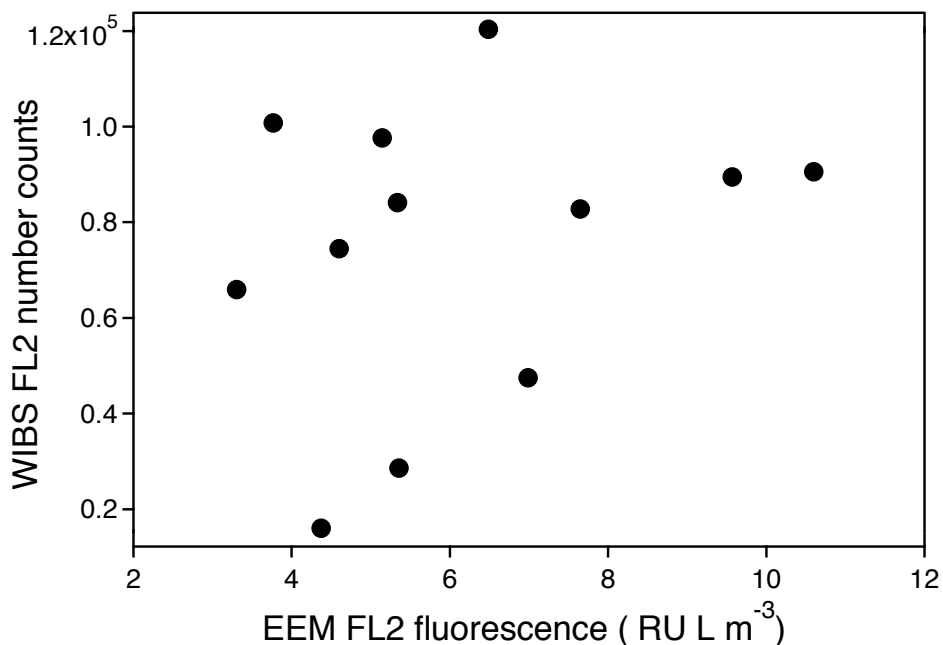

**Figure S2.** Scatter plot of number count of particles from WIBS FL2 fluorescence channel and EEM fluorescence intensity integrated in the corresponding excitation-emission zone (the rectangle defined by Excitation/Emission: 275-285 nm/420-524 nm).

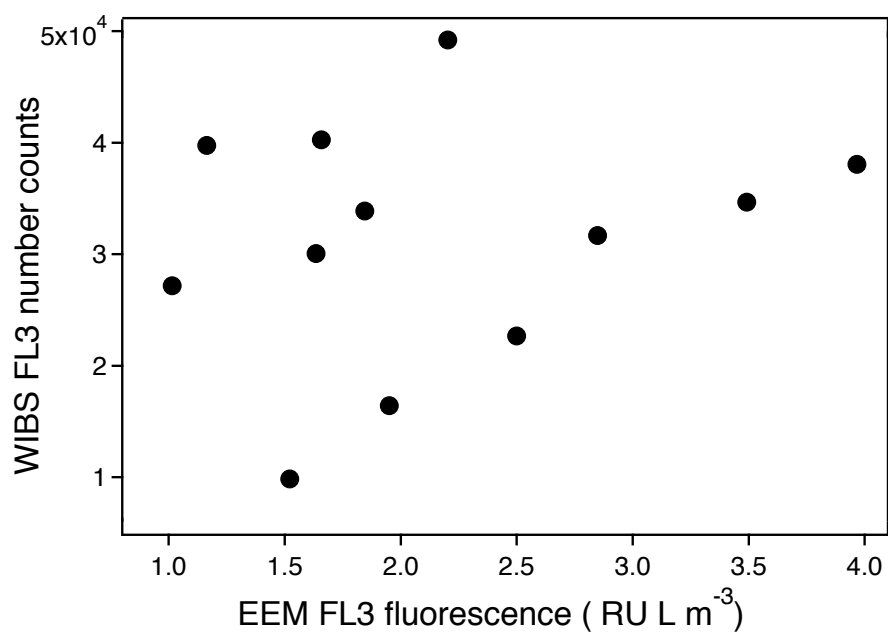

**Figure S3.** Scatter plot of number count of particles from WIBS FL3 fluorescence channel and EEM fluorescence intensity integrated in the corresponding excitation-emission zone (the rectangle defined by excitation/emission: 365-375 nm/420-524 nm).

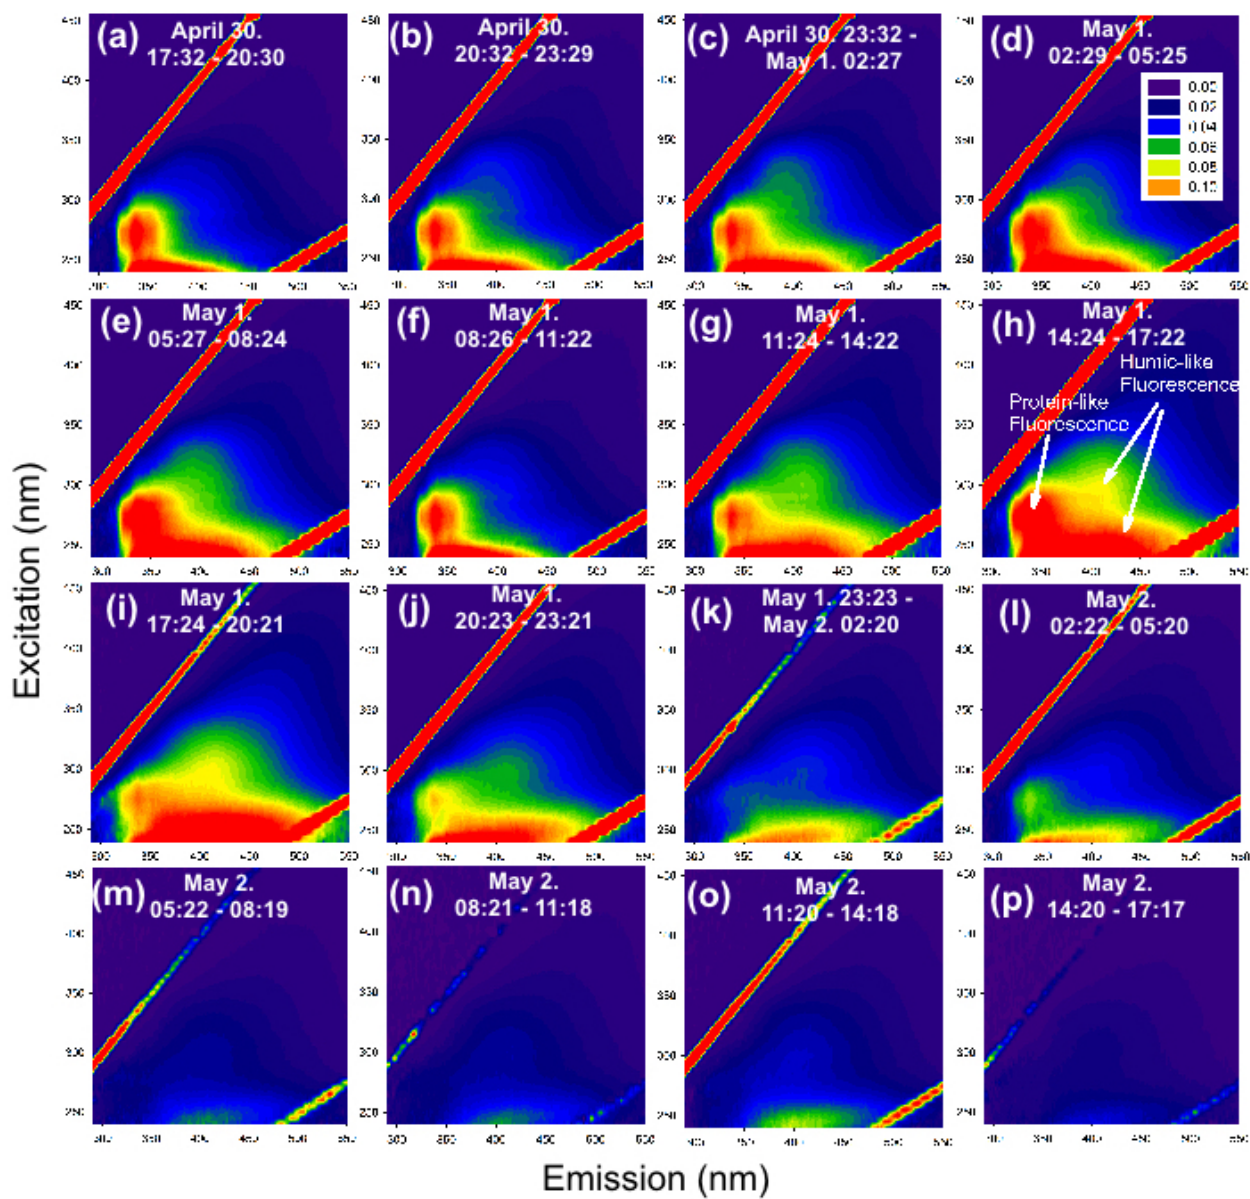

**Figure S4.** Time series of fluorescence spectra (EEM) of water-soluble organic carbon (WSOC) (in  $\text{RU L m}^{-3}$ ) before, during and after the precipitation.

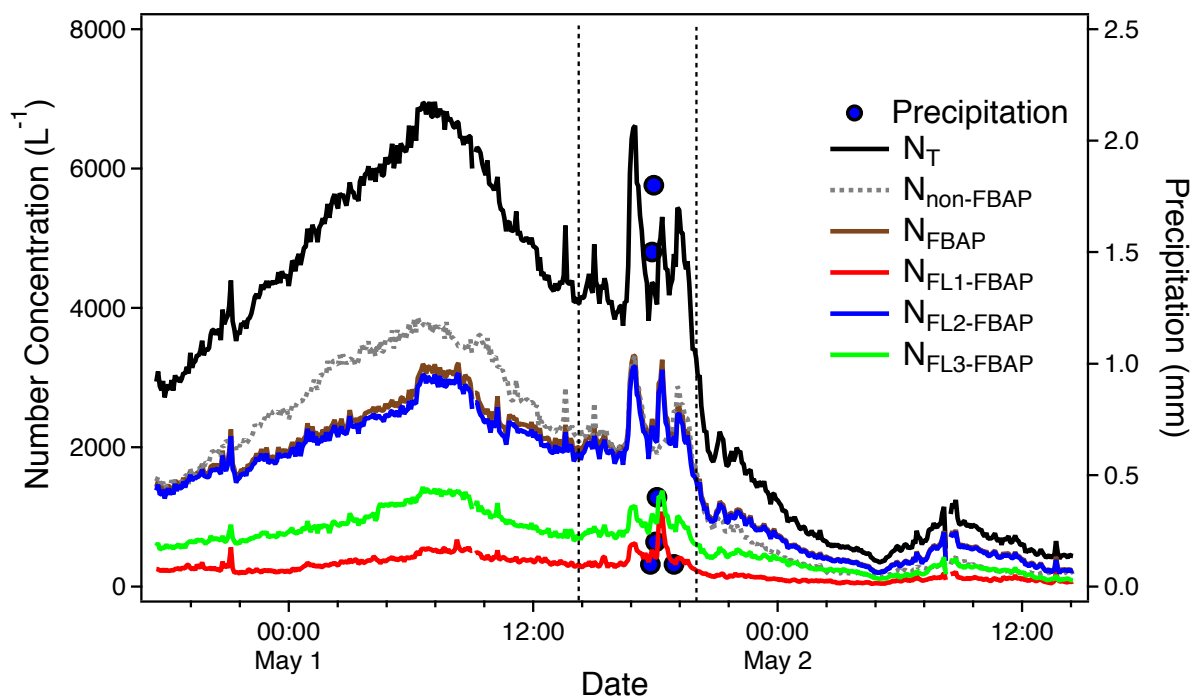

**Figure S5.** Extended temporal variations of aerosol number concentrations (for particles  $> 0.8 \mu\text{m}$ , optically scattering diameter) observed by WIBS and rainfall rate. Variables presented are number concentrations of total particles ( $N_T$ ), fluorescent biological aerosol particles ( $N_{\text{FBAP}}$ ), three different channels of fluorescent biological aerosol particles ( $N_{\text{FL1-FBAP}}$ ,  $N_{\text{FL2-FBAP}}$  and  $N_{\text{FL3-FBAP}}$ ) and non-fluorescent biological aerosol particles ( $N_{\text{non-FBAP}}$ ). Five-minute accumulated rainfall rate is shown by blue dots. The time span between the two dotted lines is discussed in the main article (Figure 1).

**Table S1.** The number concentrations of FBAP, FL1-FBAP, FL2-FBAP, FL3-FBAP and non-FBAP for 5 size modes (0.9  $\mu\text{m}$ , 1.2  $\mu\text{m}$ , 2.2  $\mu\text{m}$ , 2.8  $\mu\text{m}$  and total particles larger than 3  $\mu\text{m}$ ) in the five time periods.

| Size modes<br>( $\mu\text{m}$ ) | Before Rain<br>( $\text{L}^{-1}$ ) | Rainfall<br>( $\text{L}^{-1}$ ) |               |               | After Rain<br>( $\text{L}^{-1}$ ) |
|---------------------------------|------------------------------------|---------------------------------|---------------|---------------|-----------------------------------|
|                                 | 15:40 – 16:40                      | 16:40 – 17:40                   | 17:40 – 18:40 | 18:40 – 19:40 | 19:40 – 20:40                     |
| non-FBAP                        |                                    |                                 |               |               |                                   |
| 0.9                             | 343.5                              | 353.2                           | 271.1         | 317.8         | 211.0                             |
| 1.2                             | 208.3                              | 257.1                           | 187.8         | 223.1         | 149.3                             |
| 2.2                             | 75.4                               | 161.1                           | 121.1         | 163.8         | 100.7                             |
| 2.8                             | 10.2                               | 29.9                            | 23.8          | 37.2          | 24.1                              |
| > 3                             | 11.5                               | 29.1                            | 23.7          | 40.7          | 22.8                              |
| FBAP                            |                                    |                                 |               |               |                                   |
| 0.9                             | 209.4                              | 187.0                           | 261.4         | 194.3         | 149.3                             |
| 1.2                             | 162.3                              | 153.7                           | 184.9         | 134.4         | 102.2                             |
| 2.2                             | 125.5                              | 223.7                           | 180.3         | 178.5         | 122.1                             |
| 2.8                             | 48.9                               | 131.3                           | 91.7          | 112.3         | 62.6                              |
| > 3                             | 88.4                               | 292.3                           | 185.2         | 252.9         | 134.0                             |
| FL1-FBAP                        |                                    |                                 |               |               |                                   |
| 0.9                             | 30.2                               | 25.1                            | 59.4          | 19.5          | 13.8                              |
| 1.2                             | 23.9                               | 23.5                            | 52.1          | 19.5          | 13.3                              |
| 2.2                             | 16.9                               | 34.6                            | 34.0          | 22.8          | 15.9                              |
| 2.8                             | 10.7                               | 28.5                            | 21.2          | 21.7          | 12.5                              |
| > 3                             | 27.4                               | 107.0                           | 61.6          | 84.0          | 44.8                              |
| FL2-FBAP                        |                                    |                                 |               |               |                                   |
| 0.9                             | 197.3                              | 174.0                           | 248.3         | 184.2         | 143.0                             |
| 1.2                             | 153.7                              | 145.3                           | 177.1         | 126.2         | 96.4                              |
| 2.2                             | 121.0                              | 213.5                           | 173.3         | 172.0         | 117.0                             |
| 2.8                             | 47.8                               | 128.4                           | 89.5          | 108.7         | 60.8                              |
| > 3                             | 88.2                               | 288.7                           | 181.4         | 249.1         | 132.2                             |
| FL3-FBAP                        |                                    |                                 |               |               |                                   |
| 0.9                             | 58.5                               | 65.6                            | 107.4         | 87.0          | 63.4                              |
| 1.2                             | 50.1                               | 48.6                            | 80.0          | 52.3          | 39.2                              |
| 2.2                             | 54.4                               | 64.5                            | 65.6          | 51.6          | 37.1                              |
| 2.8                             | 28.0                               | 58.5                            | 46.3          | 47.5          | 28.4                              |
| > 3                             | 59.9                               | 179.4                           | 118.1         | 145.7         | 78.9                              |
